# Supplementary material
Source: publisher figshare collection journal article supplement (https://sage.figshare.com/ndownloader/files/13078190)

# Perceptions of Targeting in House Demolition: Survey Descriptives

## Contents

|          |                                                                                         |          |
|----------|-----------------------------------------------------------------------------------------|----------|
| <b>1</b> | <b>Sample characteristics and comparison to recent Palestinian public opinion polls</b> | <b>1</b> |
| <b>2</b> | <b>Distribution of variables in the survey dataset</b>                                  | <b>2</b> |
| 2.1      | Demolition exposure . . . . .                                                           | 2        |
| 2.2      | Support for armed resistance and opposition to compromise . . . . .                     | 4        |
| 2.3      | Demographics . . . . .                                                                  | 5        |
| 2.4      | Individual values . . . . .                                                             | 7        |
| 2.5      | Survey difficulty . . . . .                                                             | 9        |
| 2.6      | Survey experiment . . . . .                                                             | 10       |

This script last run: November 17 2017

## 1 Sample characteristics and comparison to recent Palestinian public opinion polls

**Survey sample:** 1,166 Palestinians in West Bank, East Jerusalem and Gaza Strip.

**Mode:** Paper-based, Arabic language. Coded using Optical Mark Recognition (OMR) software.

**Dates fielded:** November 20–December 11, 2016.

**Sample demographics:**

|                | Mean age | Prop. male | Prop. College degree | Prop. unemployed | Prop. student | n    |
|----------------|----------|------------|----------------------|------------------|---------------|------|
| Gaza Strip     | 28.45    | 0.48       | 0.65                 | 0.20             | 0.41          | 378  |
| West Bank      | 29.97    | 0.52       | 0.54                 | 0.20             | 0.31          | 398  |
| East Jerusalem | 29.57    | 0.43       | 0.48                 | 0.23             | 0.21          | 390  |
| Whole sample   | 29.34    | 0.48       | 0.56                 | 0.21             | 0.31          | 1166 |

As a reference point, characteristics of a recent random sample of 1200 Palestinians in the West Bank, Gaza strip and East Jerusalem, run by the Jerusalem Media and Communication Center (JMCC Poll 87, July 2016) are as follows:

- n= 1200 (750 West Bank including East Jerusalem; 450 in Gaza)
- mean age: 36.7 years
- 50.5 percent male
- 8.5 percent unemployed
- 12 percent students

**Political preferences:**

Support/opposition to armed resistance:

|                | Strongly oppose | Oppose | Borderline | Support | Strongly support |
|----------------|-----------------|--------|------------|---------|------------------|
| Gaza Strip     | 0.04            | 0.14   | 0.15       | 0.24    | 0.42             |
| West Bank      | 0.07            | 0.25   | 0.23       | 0.25    | 0.20             |
| East Jerusalem | 0.04            | 0.15   | 0.26       | 0.31    | 0.25             |
| Whole sample   | 0.05            | 0.18   | 0.21       | 0.27    | 0.29             |

Support/opposition to targeting Israeli civilians:

|                | Strongly oppose | Oppose | Borderline | Support | Strongly support |
|----------------|-----------------|--------|------------|---------|------------------|
| Gaza Strip     | 0.11            | 0.20   | 0.18       | 0.22    | 0.28             |
| West Bank      | 0.09            | 0.30   | 0.28       | 0.19    | 0.14             |
| East Jerusalem | 0.11            | 0.28   | 0.29       | 0.19    | 0.12             |
| Whole sample   | 0.10            | 0.26   | 0.25       | 0.20    | 0.18             |

Support/opposition to a two-state solution:

|                | Strongly support | Support | Borderline | Oppose | Strongly oppose |
|----------------|------------------|---------|------------|--------|-----------------|
| Gaza Strip     | 0.14             | 0.16    | 0.11       | 0.13   | 0.46            |
| West Bank      | 0.09             | 0.16    | 0.13       | 0.25   | 0.37            |
| East Jerusalem | 0.08             | 0.18    | 0.14       | 0.21   | 0.39            |
| Whole sample   | 0.10             | 0.17    | 0.13       | 0.20   | 0.41            |

Support/opposition to a two-state solution, while forgoing the right of return:

|                | Strongly support | Support | Borderline | Oppose | Strongly oppose |
|----------------|------------------|---------|------------|--------|-----------------|
| Gaza Strip     | 0.04             | 0.04    | 0.08       | 0.14   | 0.70            |
| West Bank      | 0.04             | 0.05    | 0.06       | 0.27   | 0.58            |
| East Jerusalem | 0.03             | 0.08    | 0.08       | 0.21   | 0.60            |
| Whole sample   | 0.04             | 0.06    | 0.07       | 0.21   | 0.62            |

As a reference point, similar questions about support for armed resistance and compromise in JMCC Poll 87 show:

- 37 percent support military operations against Israeli targets (32 percent in West Bank; 46.2 percent in Gaza)
- 43.7 percent support a two-state solution among other solutions (44.7 percent in West Bank; 42 percent in Gaza)

Similar questions in a random sample of 1200 Palestinians in the West Bank and Gaza, in a survey by the Palestinian Center for Policy and Survey Research (PCPSR poll 62, December 2016) show:

- 52.9 percent support or certainly support a return to armed intifada and confrontations (46.7 percent in the West Bank and 63.3 percent in Gaza)
- 53.8 percent support or certainly support armed attacks against Israeli civilians (42.9 percent in the West Bank and 71.5 percent in Gaza)
- 33.4 percent support or certainly support abandoning the two-state solution in favor of a one-state solution (31.1 percent in the West Bank; 37.1 percent in Gaza)

## 2 Distribution of variables in the survey dataset

### 2.1 Demolition exposure

In your life, have you experienced the demolition of structures belonging to yourself or others? Please select all that apply.

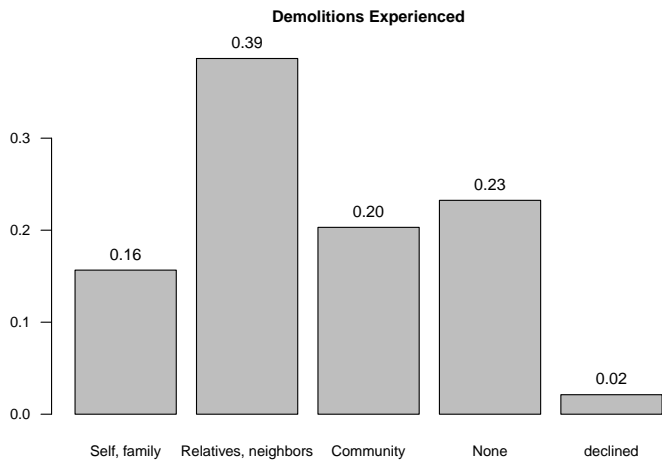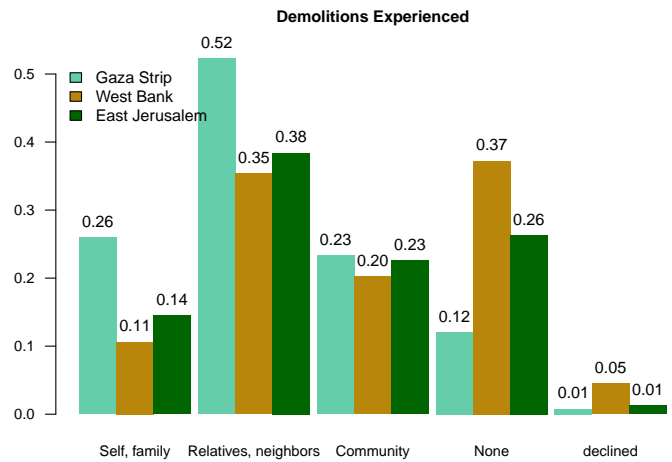

What was the year of the most recent demolition you have experienced? (YYYY)

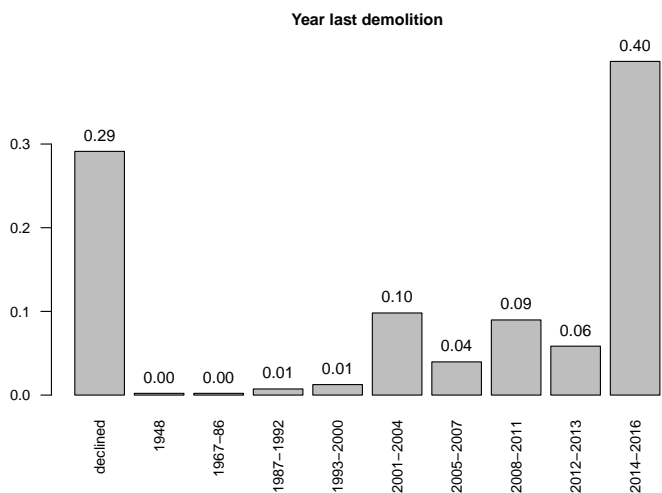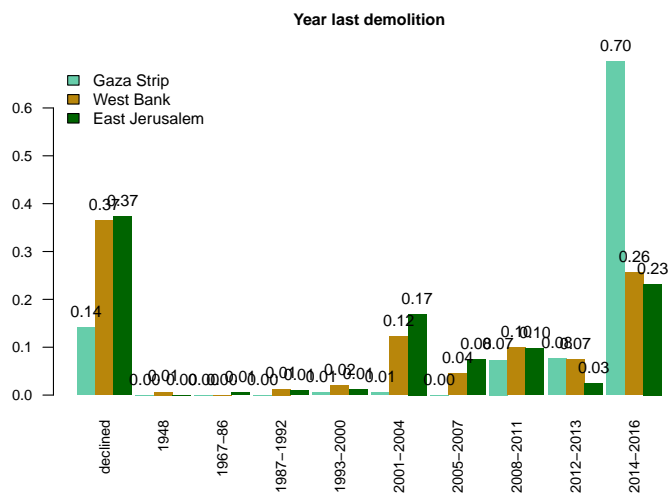

Below are some reasons for demolitions which are sometimes reported in international media. Which do you think best describe the reason(s) for most of the demolition(s) you have experienced? Please select all that apply.

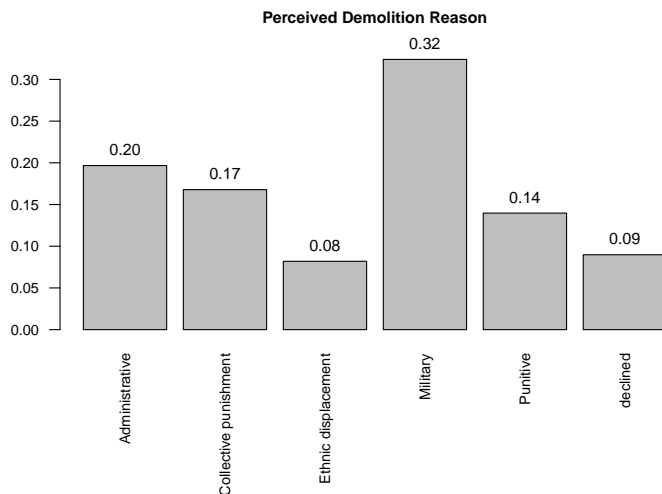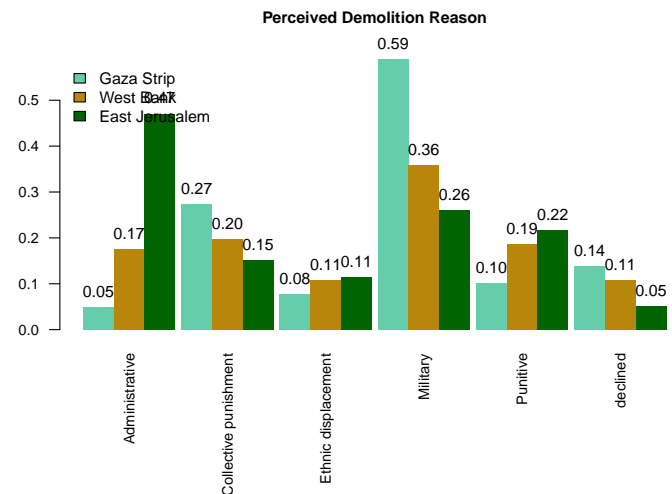

What reason(s) did Israel give for most of the demolition(s) you have experienced? Please select all that apply.

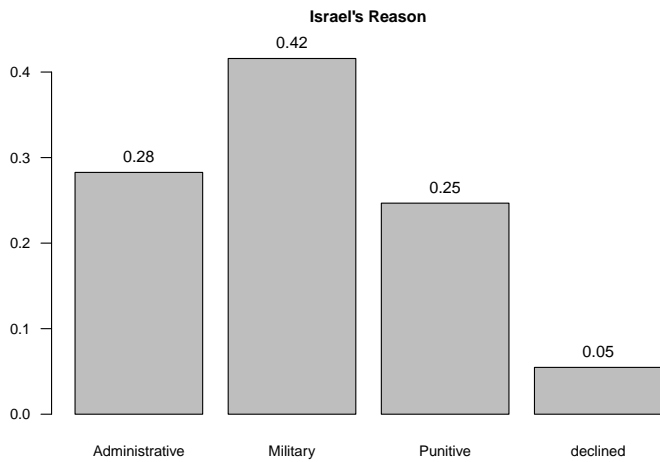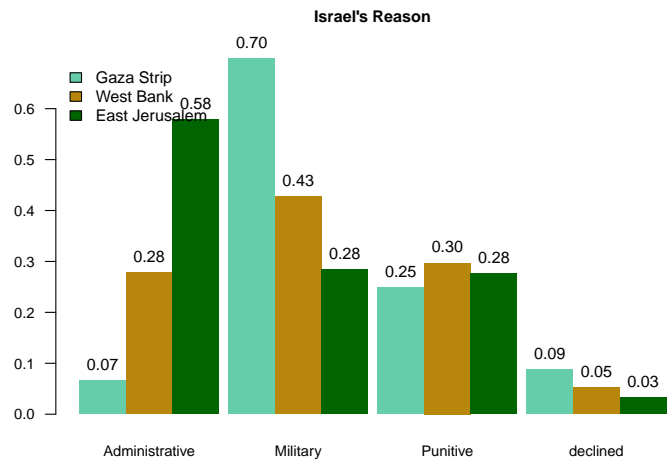

## 2.2 Support for armed resistance and opposition to compromise

In principle, do you support or oppose the use of armed resistance as means of pursuing the Palestinian people's political goals?

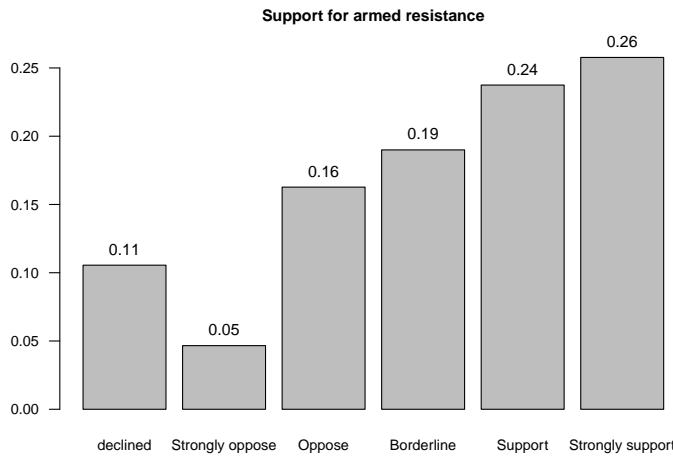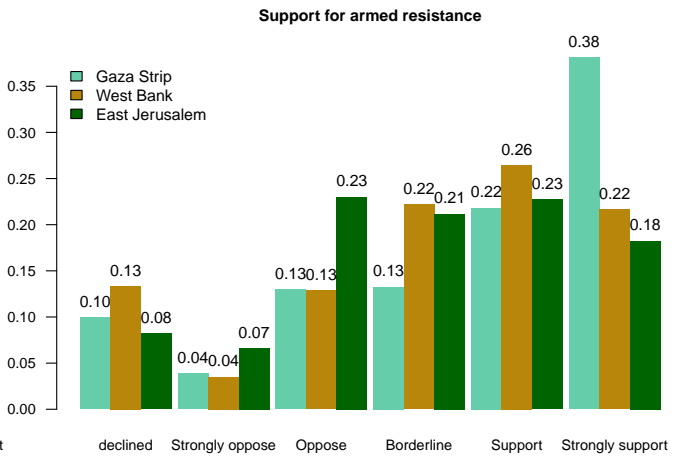

In principle, do you support or oppose the use of armed resistance which targets Israeli civilians?

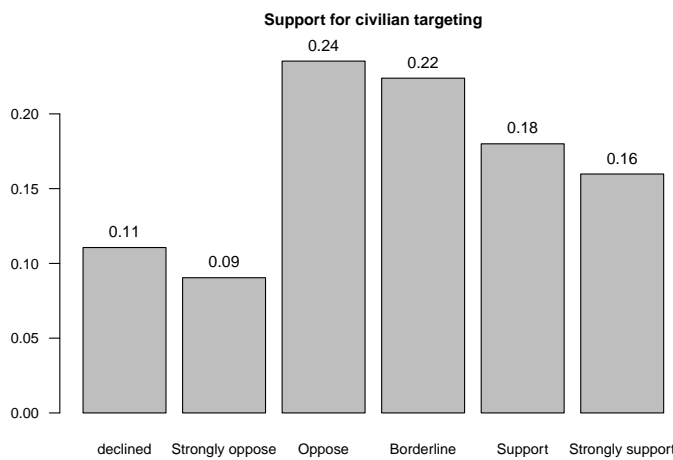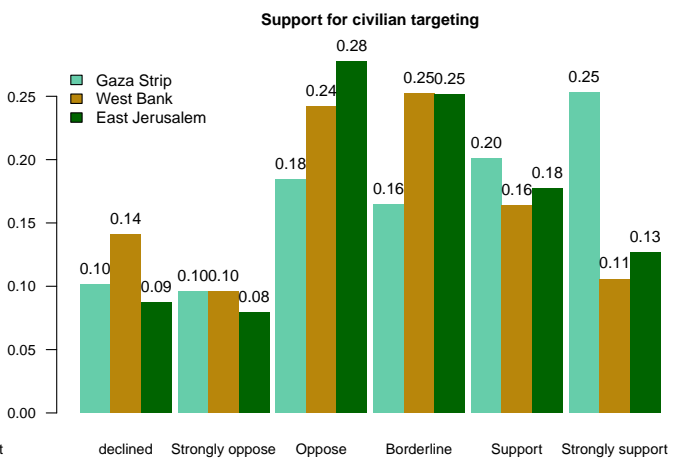

In principle, do you support or oppose the solution of two states for two peoples?

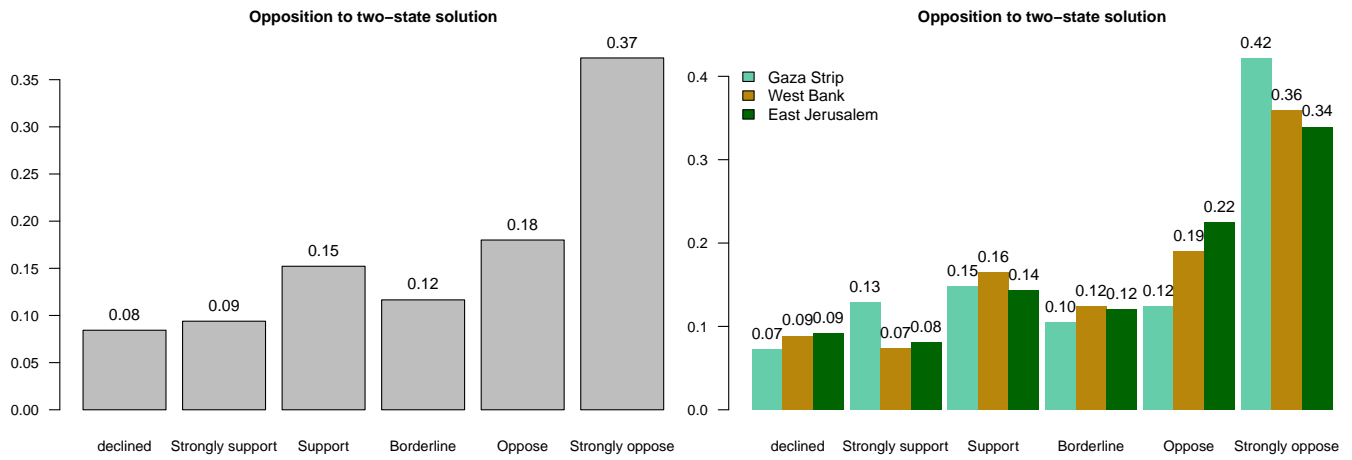

What is your opinion about signing a peace agreement with Israel based on a two-state solution, while forgoing the return of refugees?

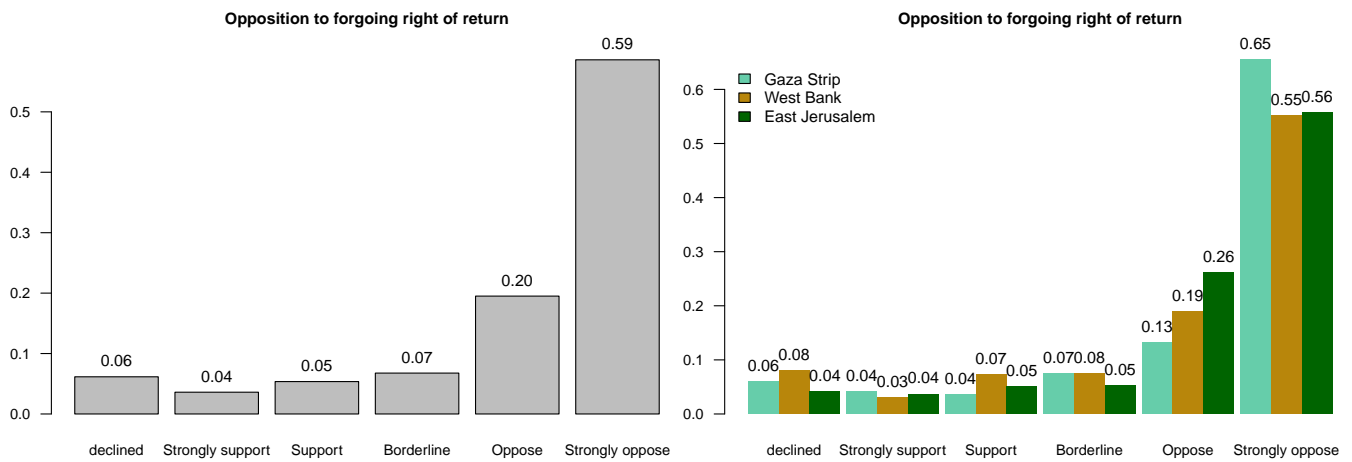

## 2.3 Demographics

Are you male or female?

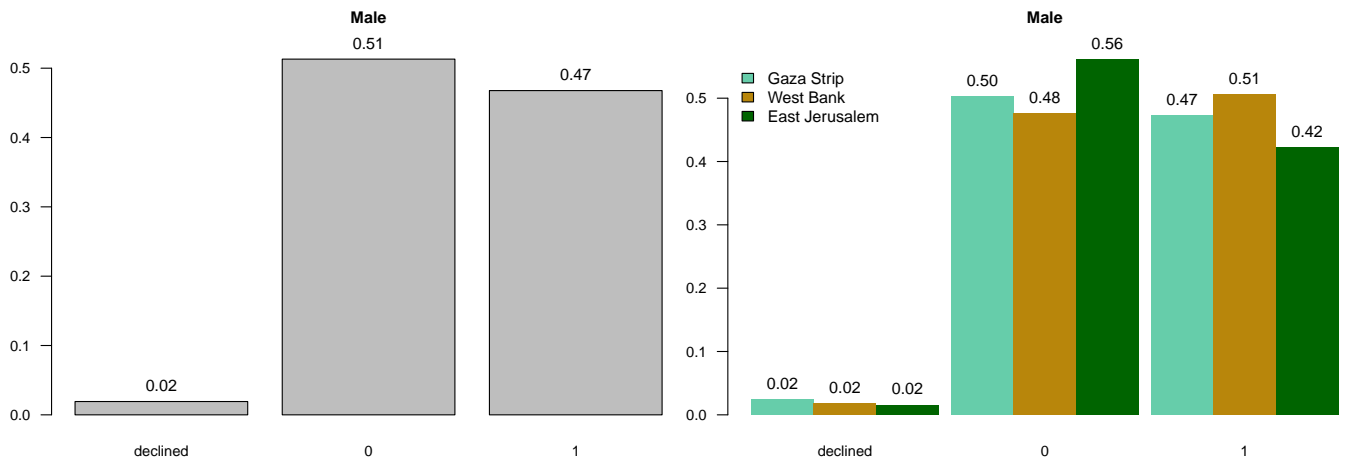

What is your age (in years)?

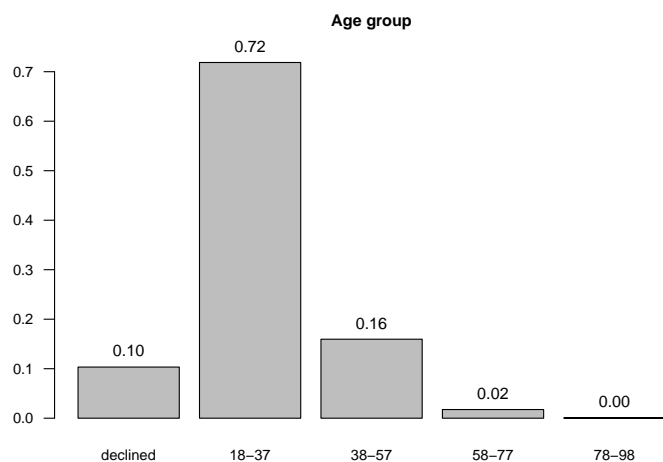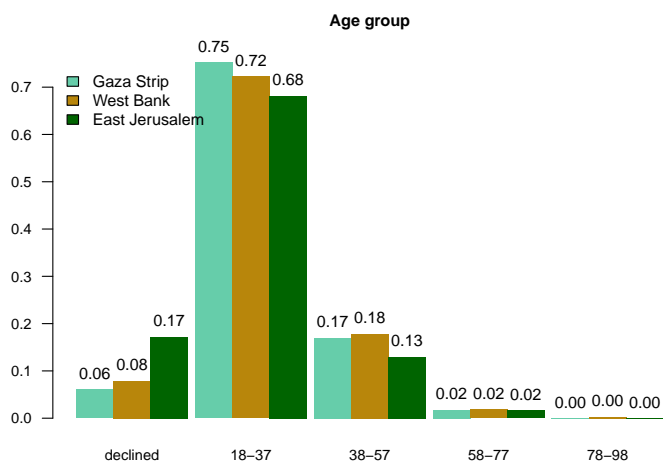

What is the highest level of education you have completed?

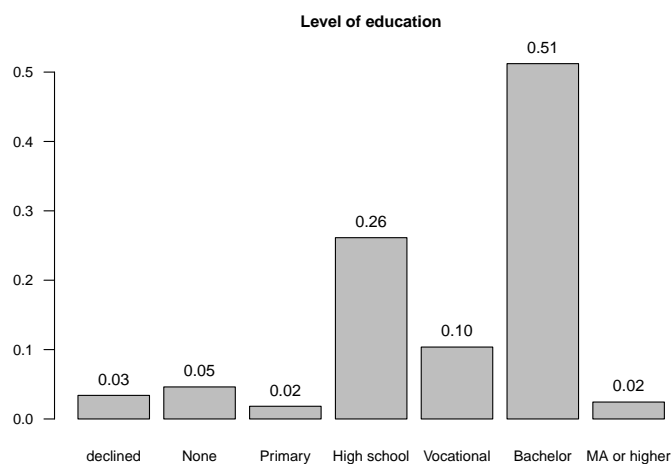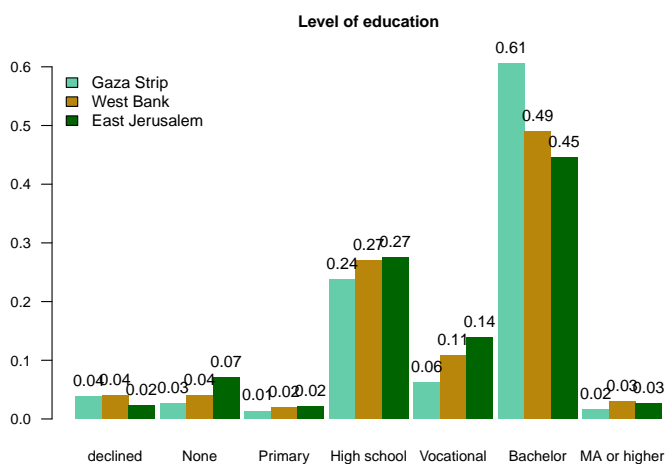

What is your current employment status?

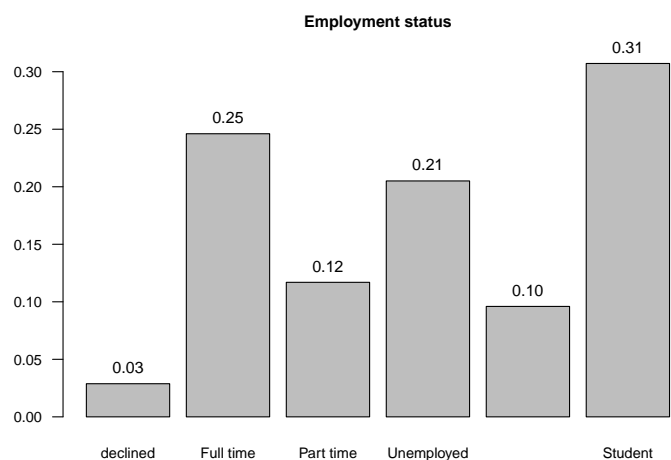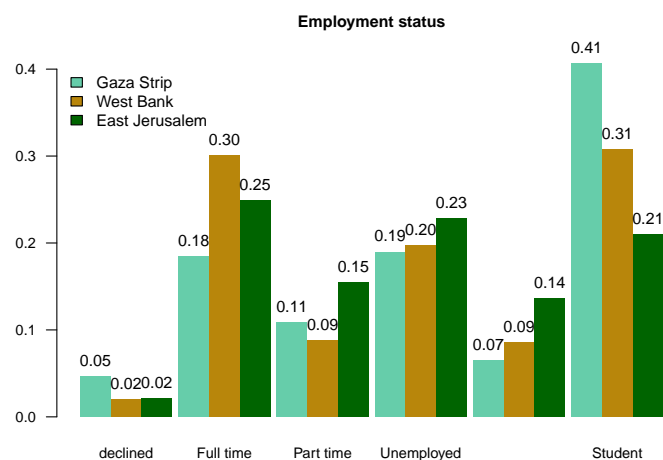

In which governorate do you live?

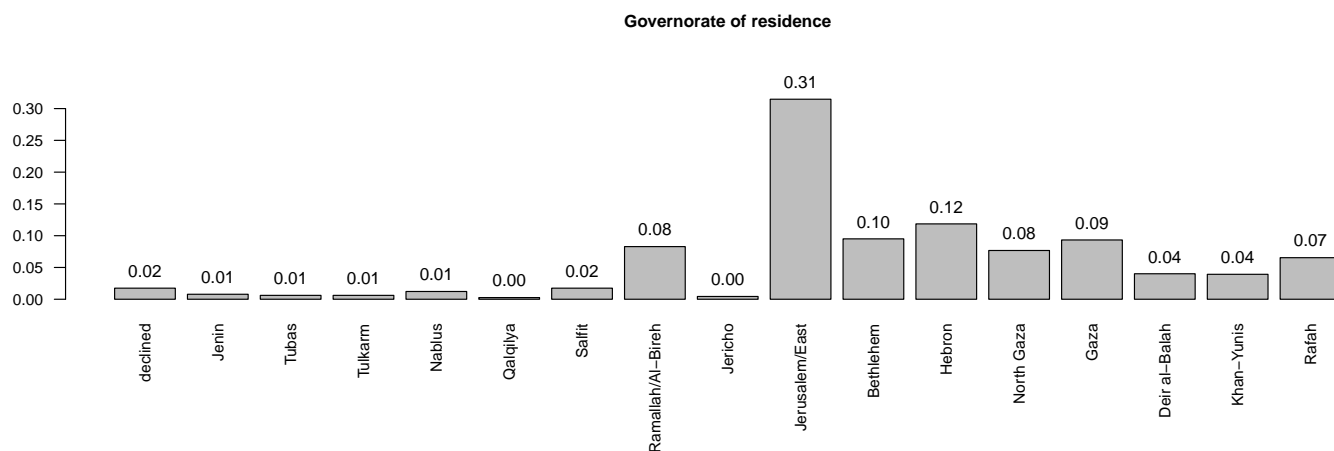

## 2.4 Individual values

How important would you say each of the following values are in your life?

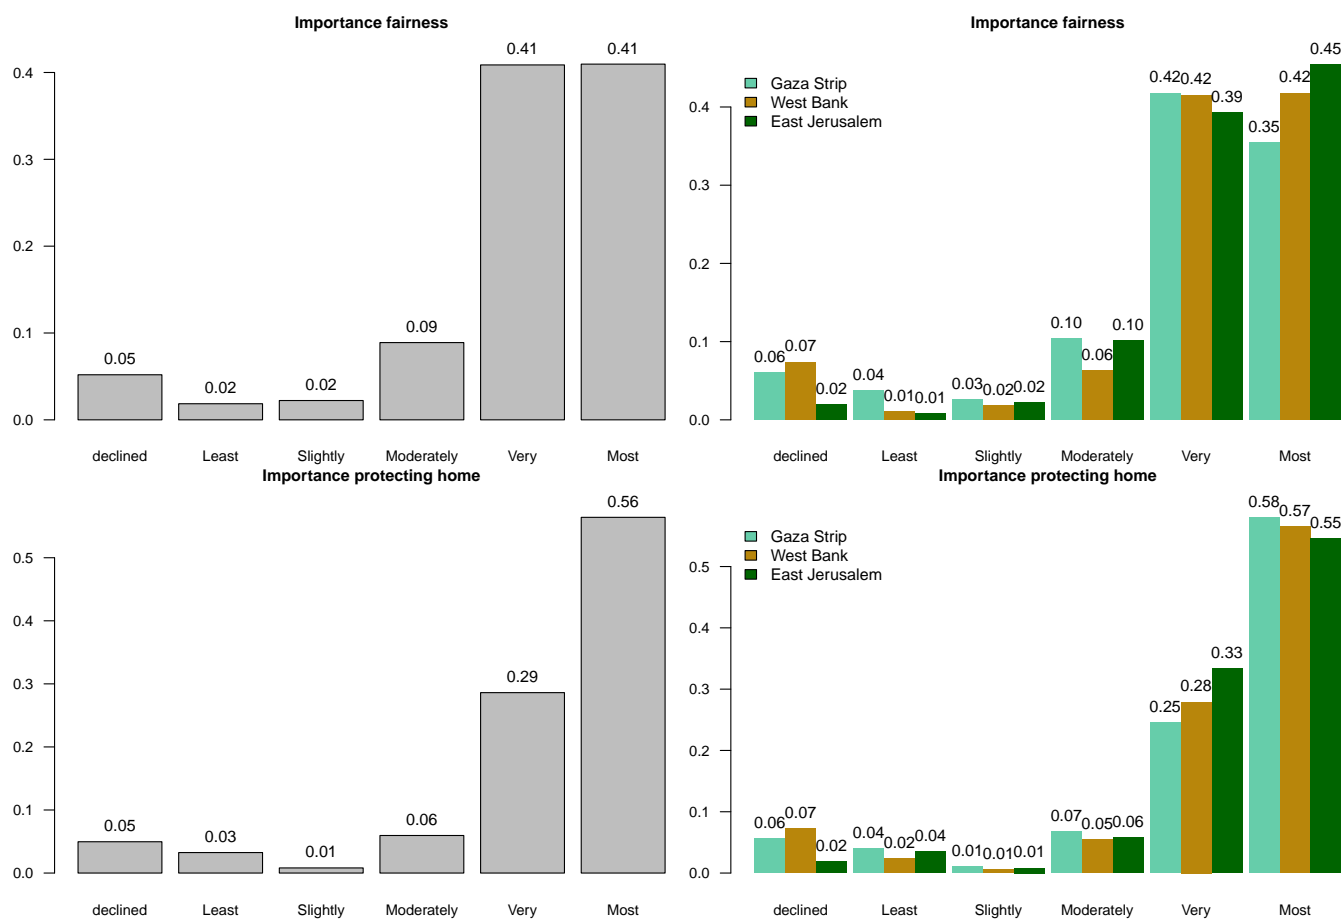

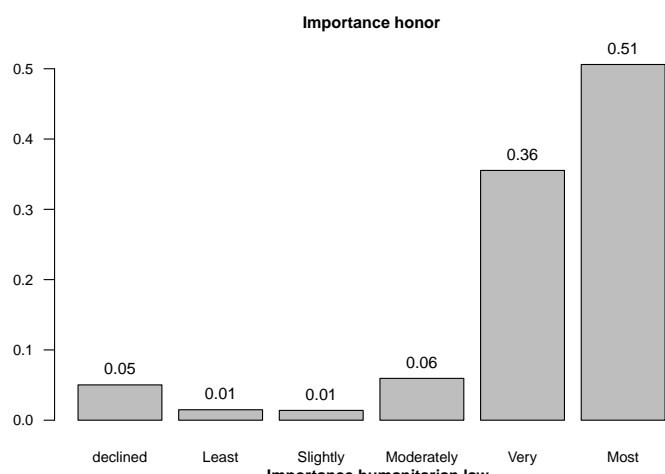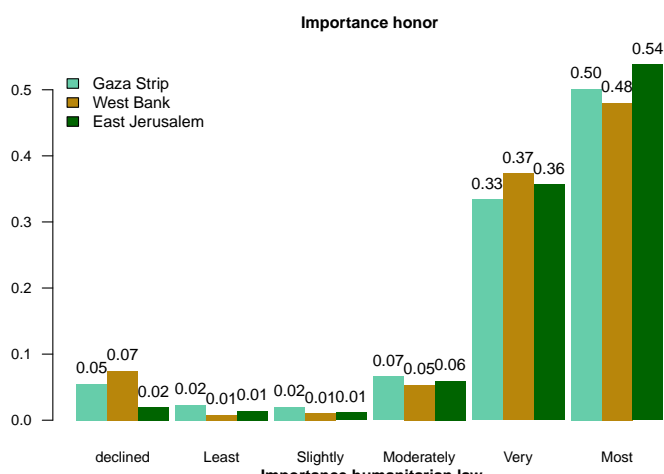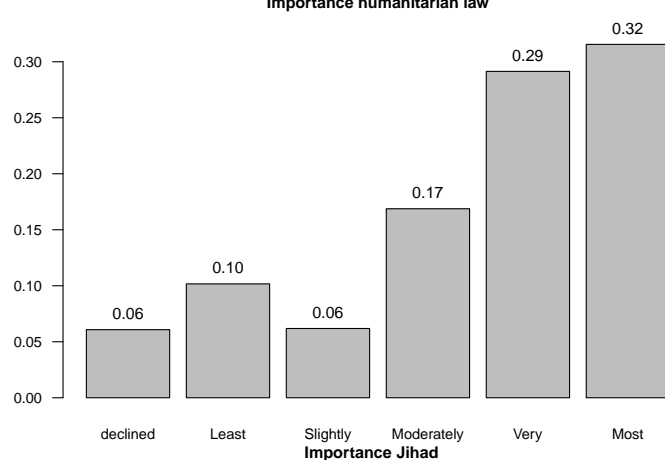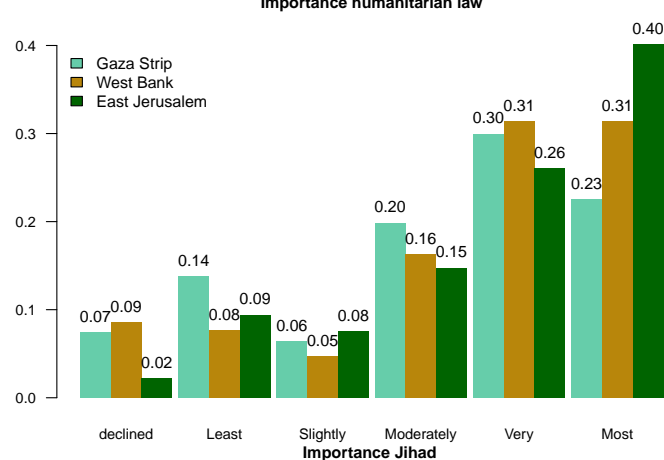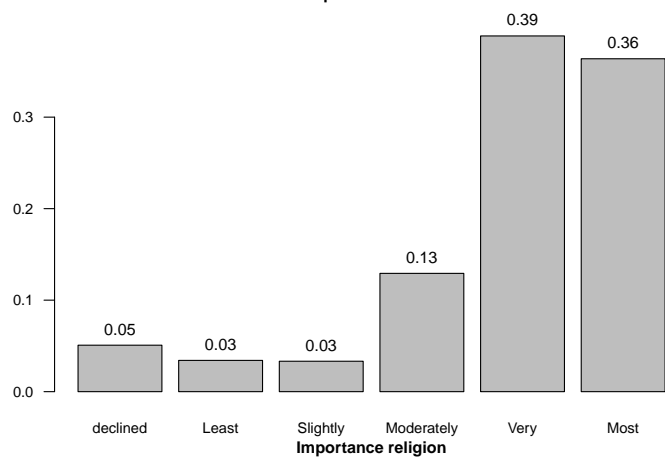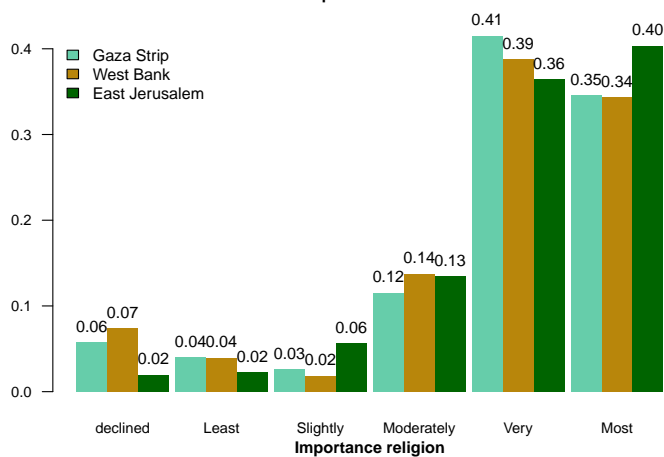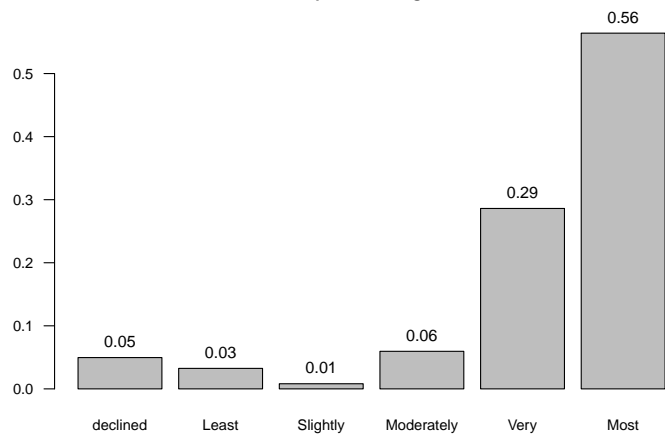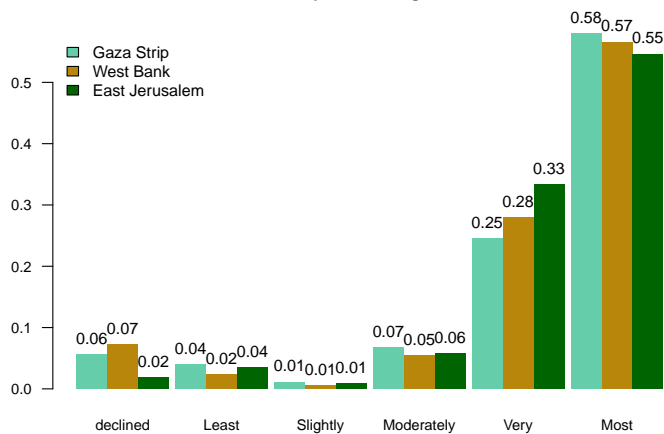



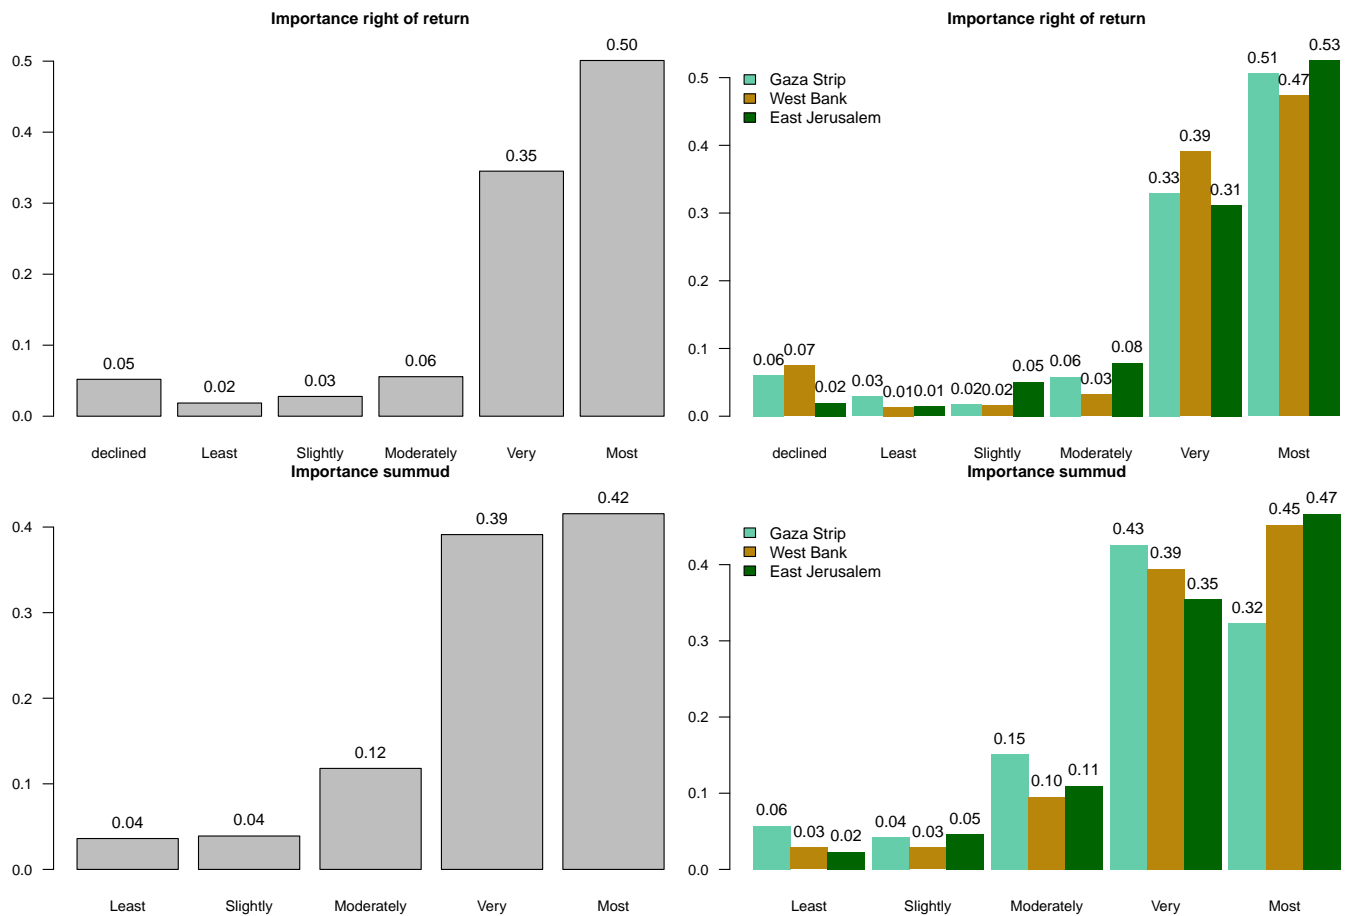

If you had to choose only one reason, would you say the issue of the land is significant because it is:

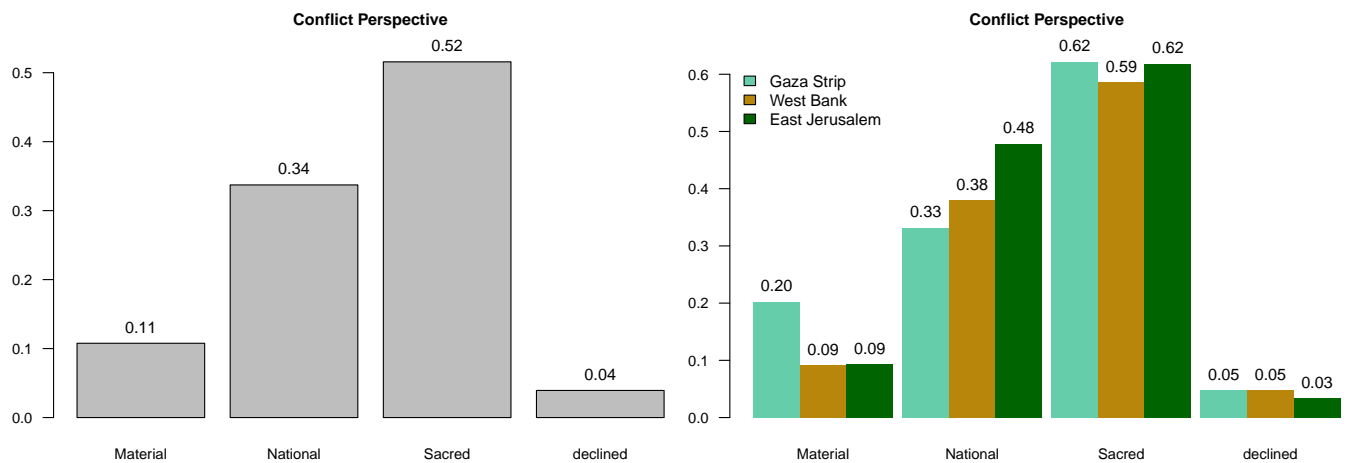

## 2.5 Survey difficulty

To help us improve this survey, please describe any difficulty you might have had in answering the survey questions. Select all that apply.

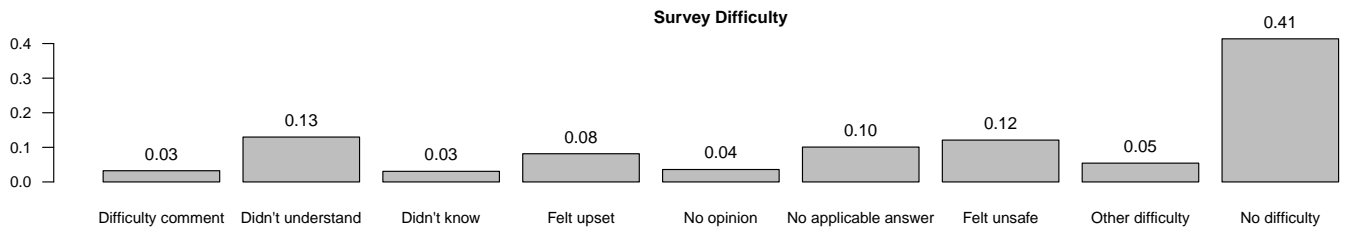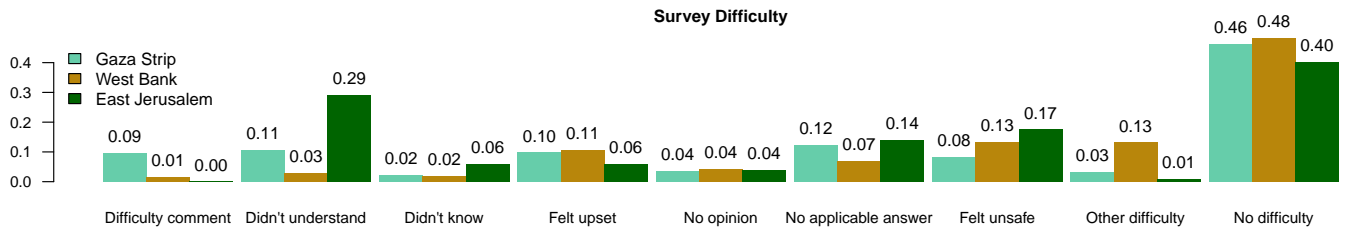

## 2.6 Survey experiment

In the example event, who would you say was affected by the demolition? Please select one answer.

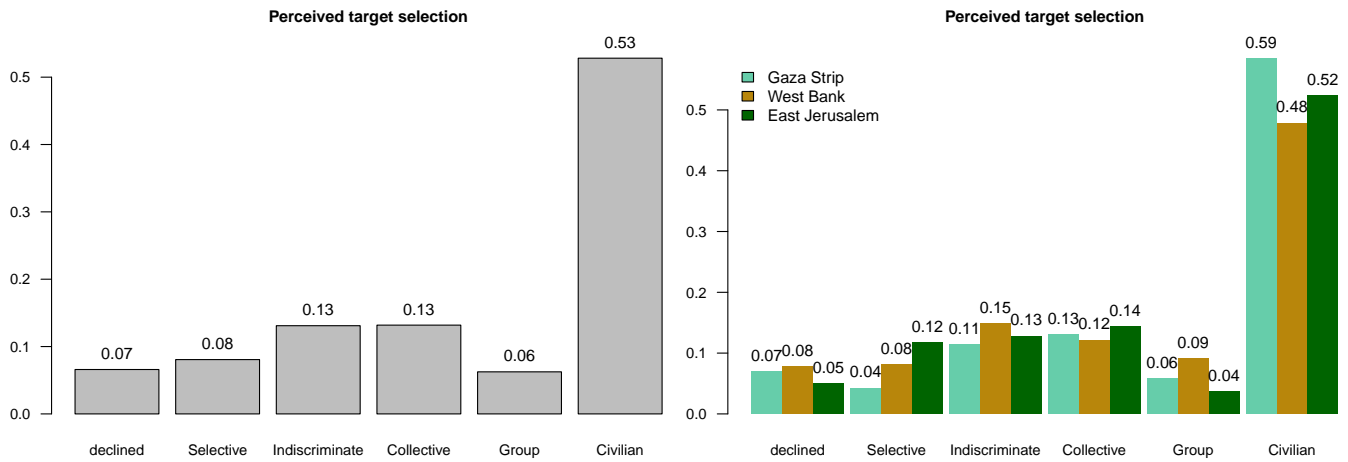

If a demolition such as the one in the example occurred today, what do you think is the percentage of ordinary Palestinians who would use armed resistance in response?

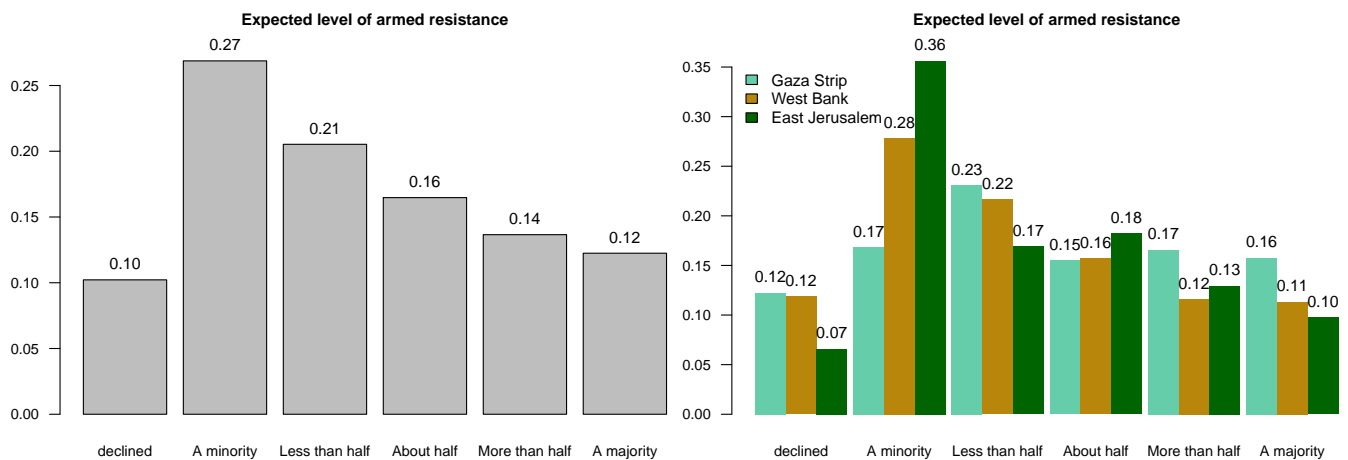

If a demolition such as the one in the example occurred today, what do you think is the percentage of ordinary Palestinians who would use non-violent resistance in response?

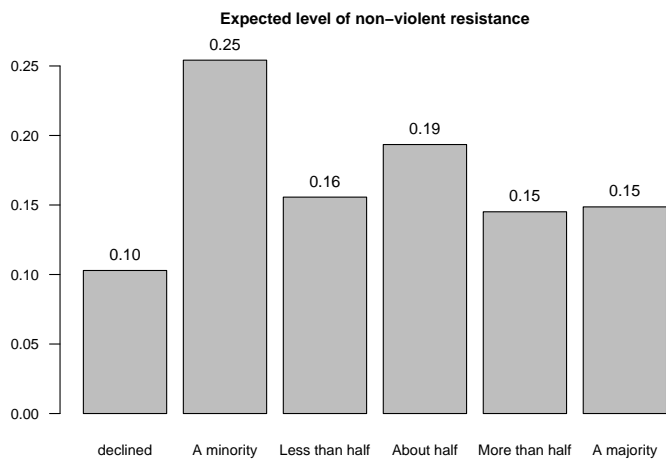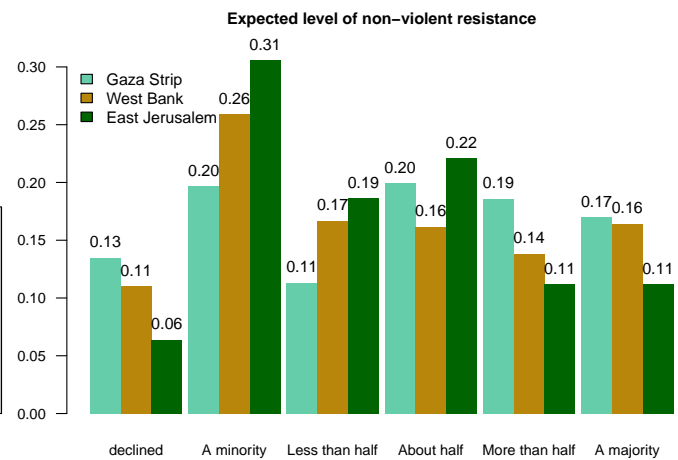

## Post-experiment variables, by survey experiment vignette

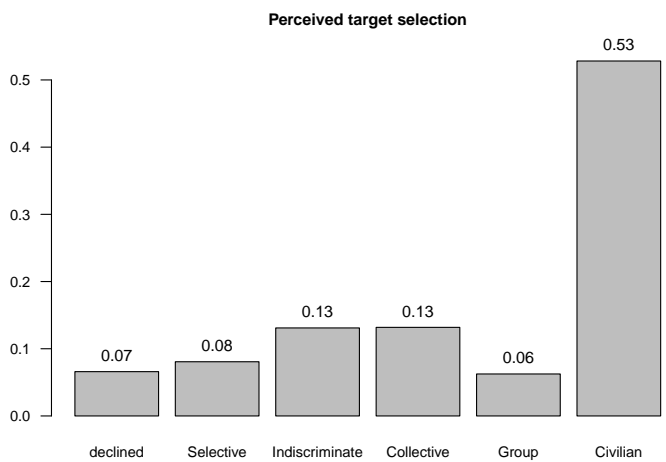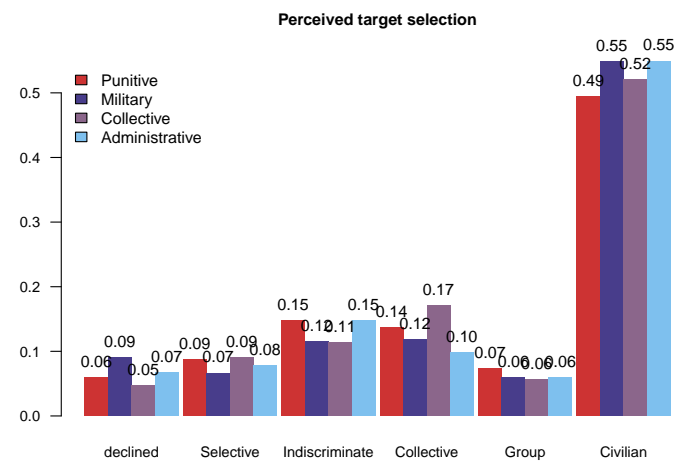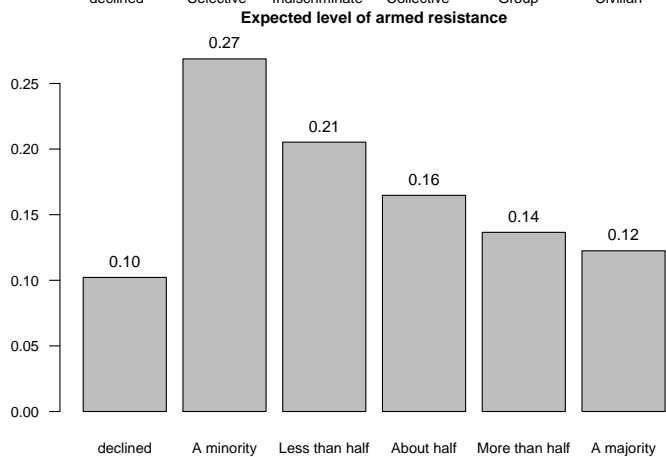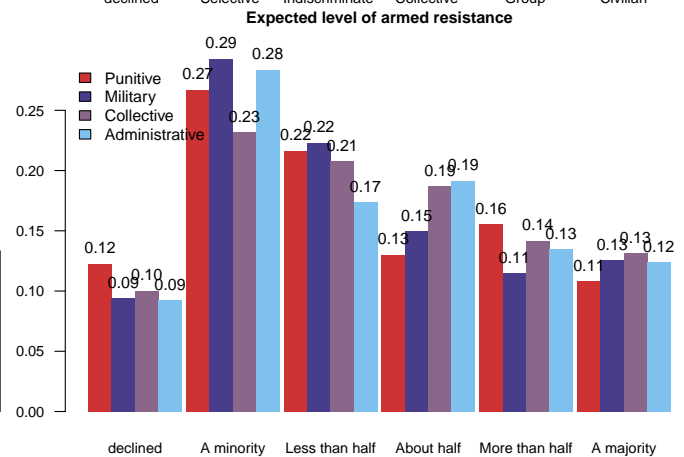

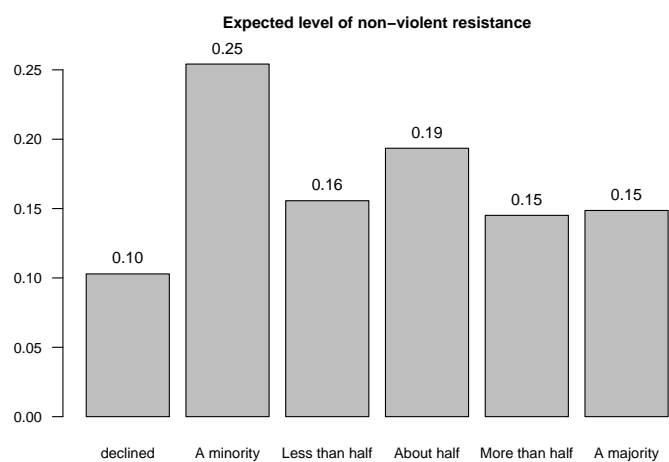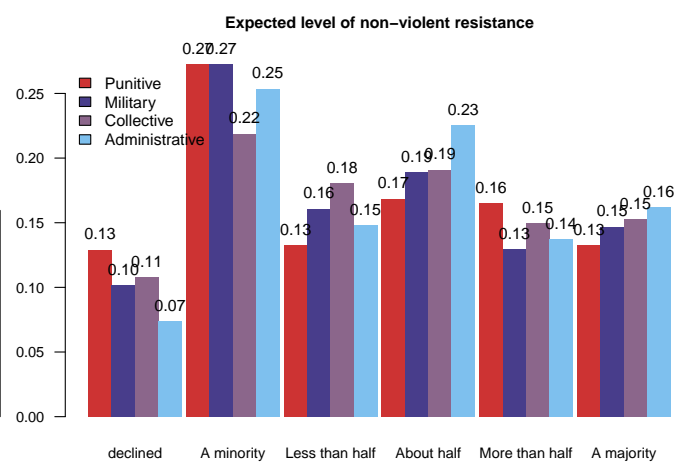

Supplement: Supplementary file 1 [file 13078190]
